# Supplementary material for: i4mC-Deep: An Intelligent Predictor of N4-Methylcytosine Sites Using a Deep Learning Approach with Chemical Properties
Source: MDPI journal article supplement (doi:10.3390/genes12081117), 2021-07-23
Supplement: s1 [file s1]

## i4mC-Deep: An intelligent predictor of N4-methylcytosine sites using a deep learning approach with chemical properties

Waleed Alam<sup>1</sup>, Hilal Tayara<sup>2,\*</sup>, Kil To Chong<sup>1,3,\*</sup>

<sup>1</sup>Department of Electronics and Information Engineering, Jeonbuk National University, Jeonju 54896, South Korea; waleedtkr@jbnu.ac.kr

<sup>2</sup>School of International Engineering and Science, Jeonbuk National University, Jeonju, 54896, South Korea; hilaltayara@jbnu.ac.kr

<sup>3</sup>Advanced Electronics and Information Research Center, Jeonbuk National University, Jeonju 54896, South Korea; kitchong@jbnu.ac.kr

\* Correspondence: hilaltayara@jbnu.ac.kr; kitchong@jbnu.ac.kr

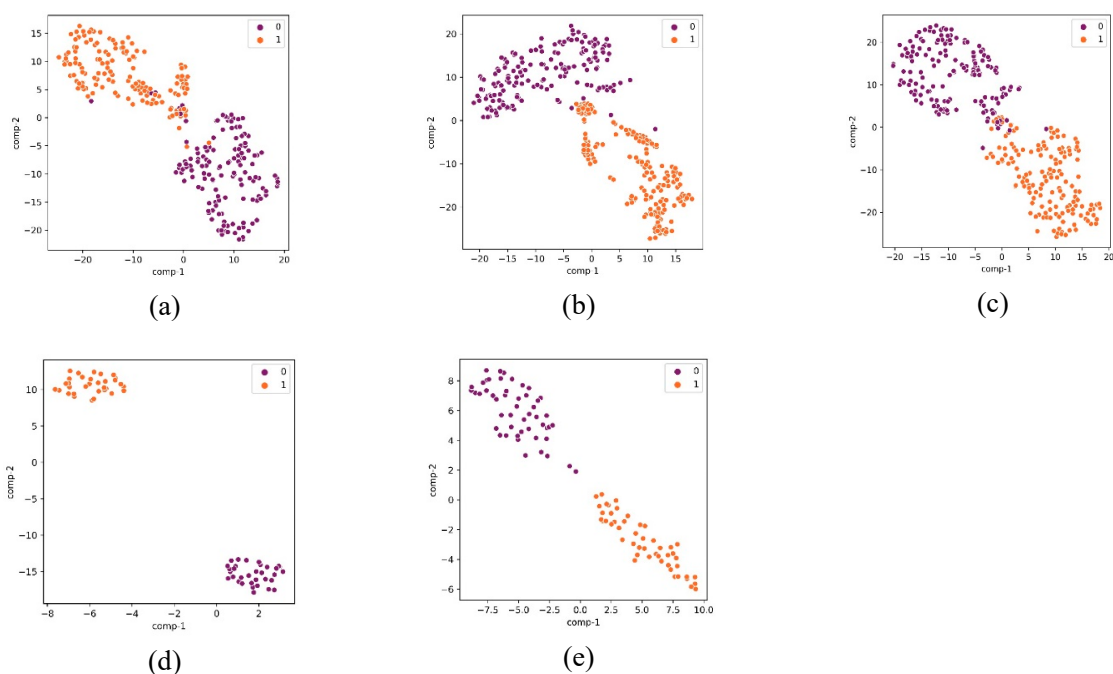

Figures S1. The t-SNE visualization of the learned features for *C. elegans* (a), *A. thaliana* (b), *D. melanogaster* (c), *E. coli* (d), and *G. pickeringii* (e). The ‘0’ represents the features of the negative samples and ‘1’ represents the features of the positive samples.

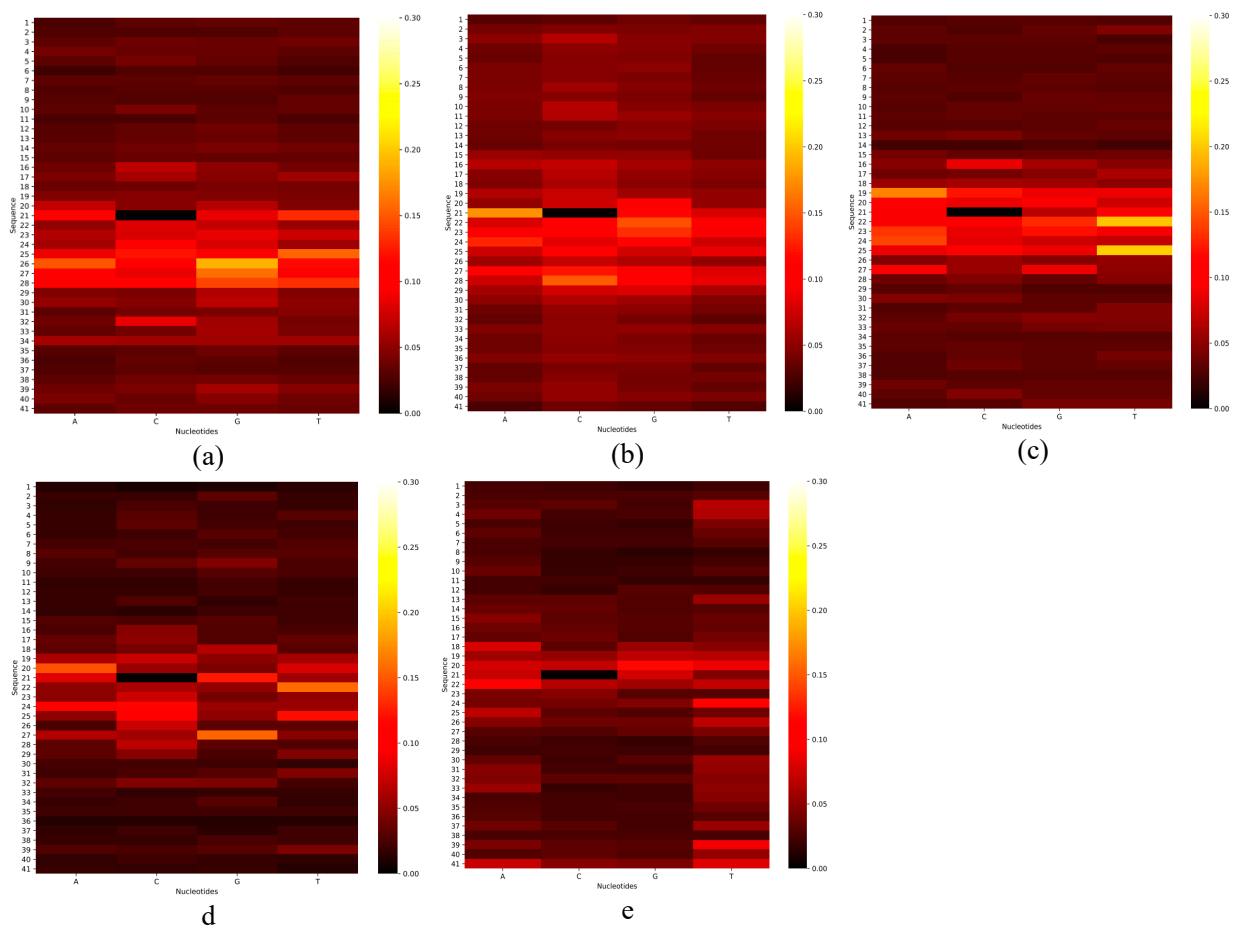

Figures S2. Heatmaps of in silico mutagenesis analysis for *C. elegans* (a), *A. thaliana* (b), *D. melanogaster* (c), *E. coli* (d), and *G. pickeringii* (e).

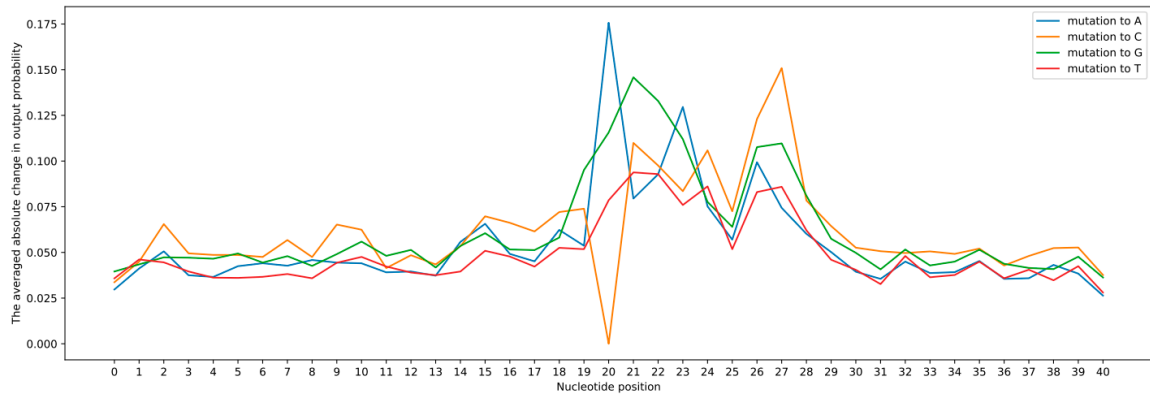

Figure S3. The effects of mutation on the prediction result in *A. thaliana*. It can be seen that mutations in the flanking regions, positions 0 to 18 and positions 28 to 40, have a small impact on the prediction performance. However, some of the mutations at positions 19 to 27 alter the prediction by more than 10%. The most noticeable alteration in the prediction occurs due to the mutations to Adenine (A) at position 20, and to Cytosine (C) at position 27, more than 15%.

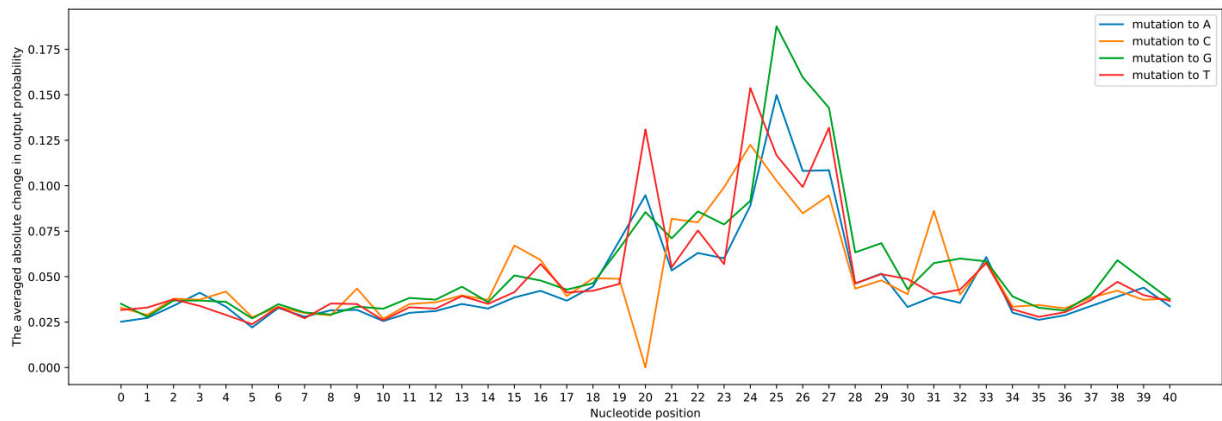

Figure S4. The effects of mutation on the prediction result in *C. elegans*. It can be seen that mutations in the flanking regions, positions 0 to 19 and positions 28 to 40, have a small impact on the prediction performance. However, some of the mutations at positions 20 to 27 alter the prediction by more than 10%. The most noticeable alteration in the prediction occurs due to the mutation to Guanine (G) at position 25, more than 17%.

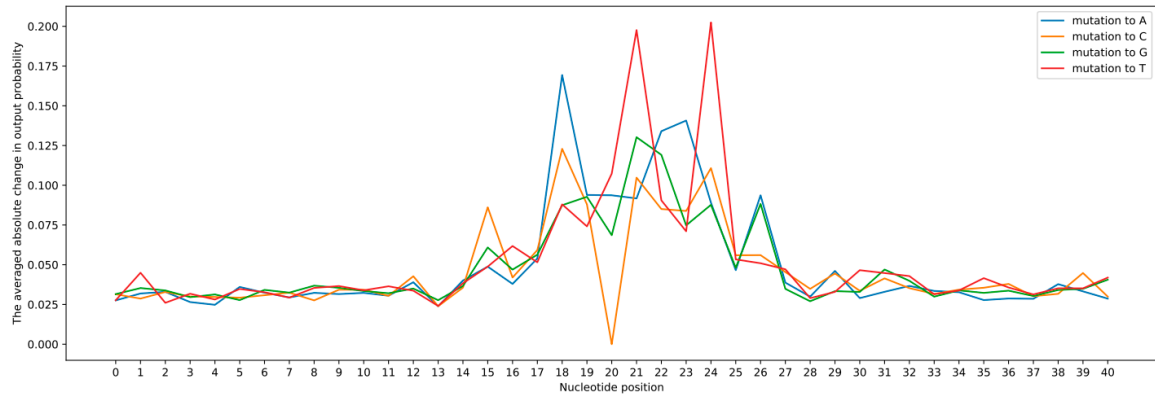

Figure S5. The effects of mutation on the prediction result in *D. melanogaster*. It can be seen that mutations in the flanking regions, positions 0 to 17 and positions 25 to 40, have a small impact on the prediction performance. However, some of the mutations at positions 18 to 24 alter the prediction by more than 10%. The most noticeable alteration in the prediction occurs due to the mutations to Thymine (T) at positions 21 and 24, and to Adenine (A) at position 18, more than 15%.

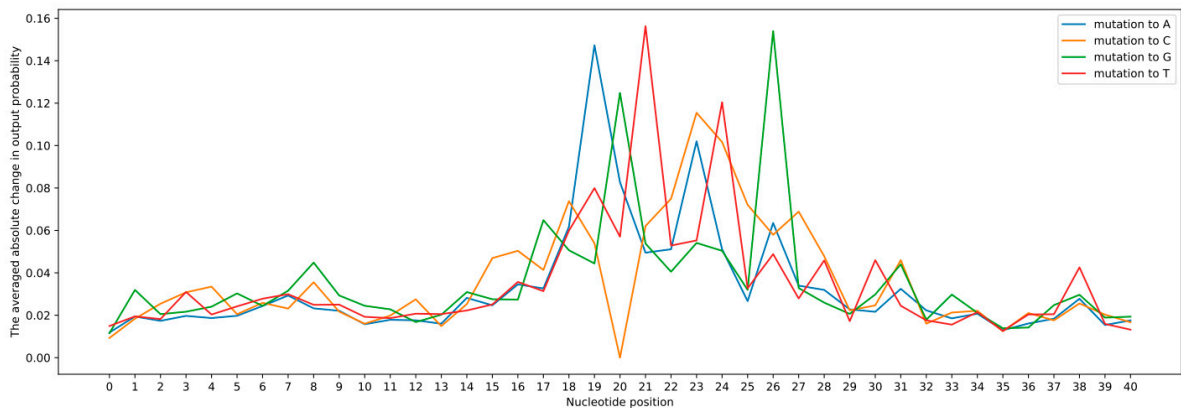

Figure S6. The effects of mutation on the prediction result in *E. coli*. It can be seen that mutations in the flanking regions, positions 0 to 18 and positions 27 to 40, have a small impact on the prediction performance. However, some of the mutations at positions 19 to 26 alter the prediction by more than 10%. The most noticeable alteration in the prediction occurs due to the mutations to Thymine (T) at position 21, and to Guanine (G) at position 26, more than 15%.

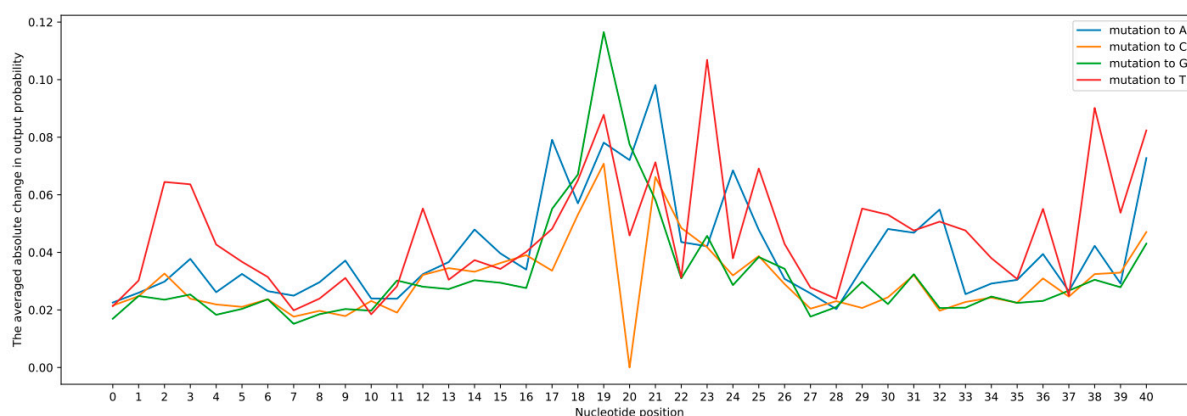

Figure S7. The effects of mutation on the prediction result in *G. pickeringii*. It can be seen that mutations to Guanine (G) at positions 19 and to Thymine (T) at position 23 alter the prediction by more than 10%. It can be noticed that the in silico analysis of *G. pickeringii* shows a different pattern compared with the other species in this study.

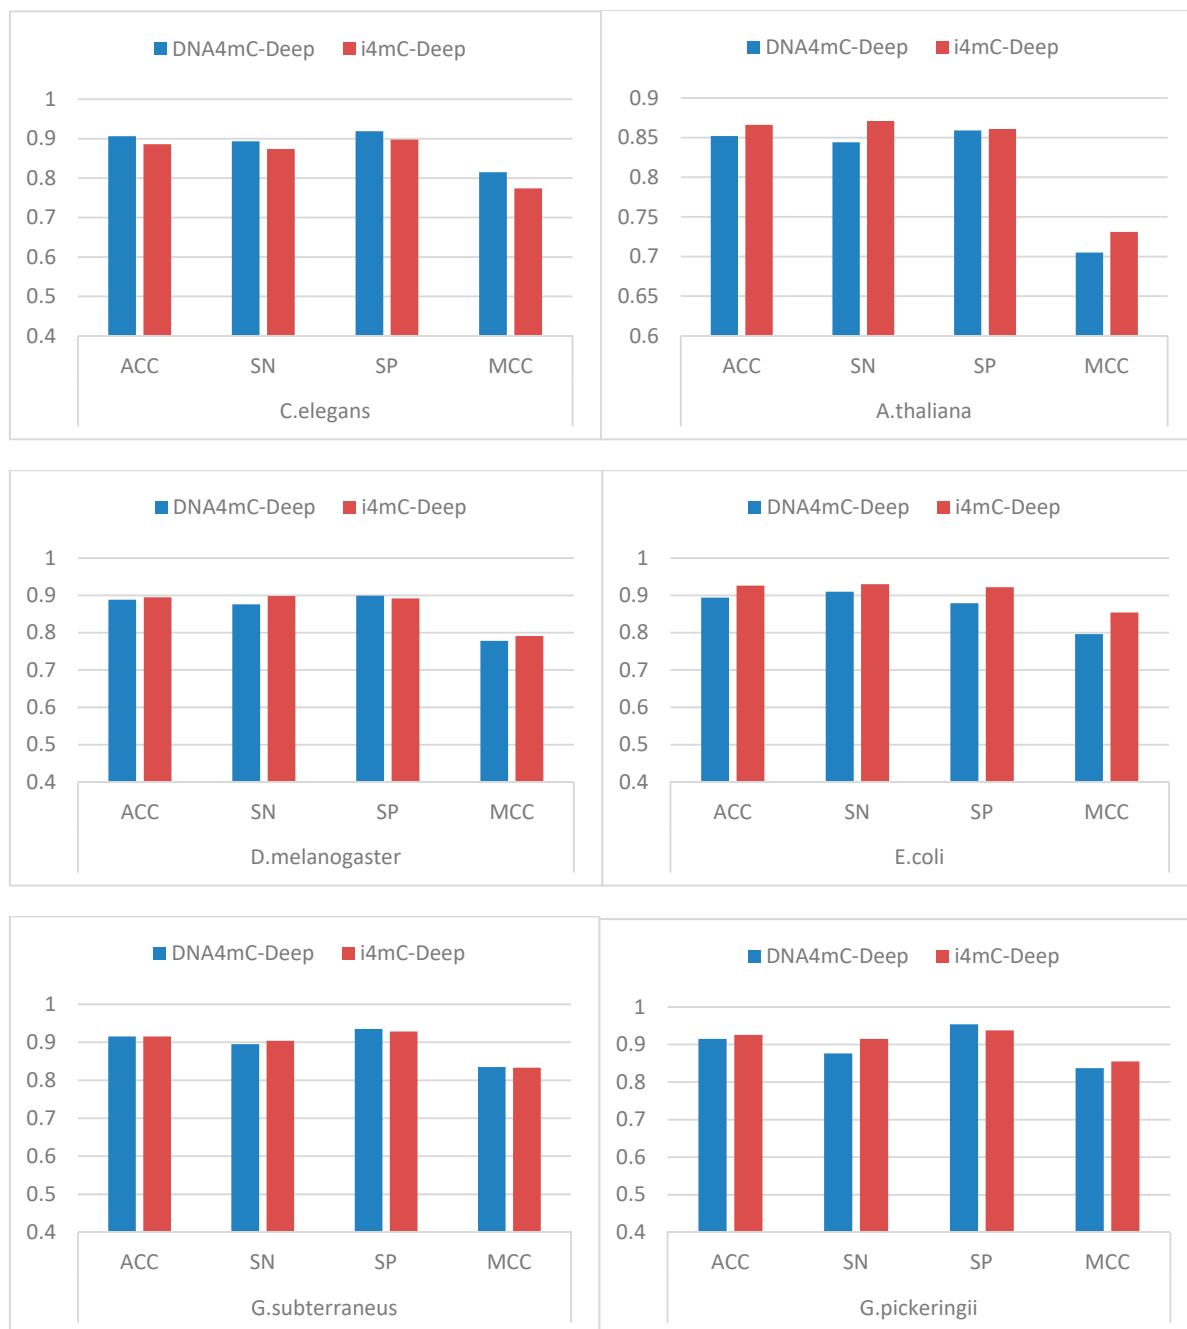

Figure S8. The comparison results between i4mC-Deep and DNA4mC-Deep after training the DNA4mC-Deep model on the six species in this study.

**Table S1.** The performance comparison between the i4mC-Deep and the DNA4mC-Deep after training the DNA4mC-Deep model on six species.

| Dataset                | Methods     | ACC          | SN           | SP           | MCC          |
|------------------------|-------------|--------------|--------------|--------------|--------------|
| <i>C. elegans</i>      | DNA4mC-Deep | 0.906        | 0.893        | 0.919        | 0.815        |
|                        | i4mC-Deep   | 0.886        | 0.874        | 0.898        | 0.774        |
| <i>D. melanogaster</i> | DNA4mC-Deep | 0.888        | 0.876        | 0.899        | 0.778        |
|                        | i4mC-Deep   | <b>0.895</b> | <b>0.898</b> | <b>0.892</b> | <b>0.791</b> |
| <i>A. thaliana</i>     | DNA4mC-Deep | 0.852        | 0.844        | 0.859        | 0.705        |
|                        | i4mC-Deep   | <b>0.866</b> | <b>0.871</b> | <b>0.861</b> | <b>0.731</b> |
| <i>E. coli</i>         | DNA4mC-Deep | 0.894        | 0.91         | 0.879        | 0.796        |
|                        | i4mC-Deep   | <b>0.926</b> | <b>0.93</b>  | <b>0.922</b> | <b>0.854</b> |
| <i>G. subterraneus</i> | DNA4mC-Deep | 0.915        | 0.895        | 0.935        | 0.835        |
|                        | i4mC-Deep   | 0.915        | <b>0.904</b> | 0.928        | 0.833        |
| <i>G. pinkeringii</i>  | DNA4mC-Deep | 0.915        | 0.876        | 0.954        | 0.837        |
|                        | i4mC-Deep   | <b>0.926</b> | <b>0.915</b> | 0.938        | <b>0.855</b> |

**Table S2.** The performance comparison between i4mC-Deep and pretrained cross-species model DNA4mC-Deep.

| Dataset                | Methods     | ACC          | SN           | SP           | MCC          |
|------------------------|-------------|--------------|--------------|--------------|--------------|
| <i>C. elegans</i>      | DNA4mC-Deep | 0.508        | 0.427        | 0.590        | 0.022        |
|                        | i4mC-Deep   | <b>0.886</b> | <b>0.874</b> | <b>0.898</b> | <b>0.774</b> |
| <i>D. melanogaster</i> | DNA4mC-Deep | 0.497        | 0.320        | 0.675        | -0.004       |
|                        | i4mC-Deep   | <b>0.895</b> | <b>0.898</b> | <b>0.892</b> | <b>0.791</b> |
| <i>A. thaliana</i>     | DNA4mC-Deep | 0.504        | 0.550        | 0.458        | 0.010        |
|                        | i4mC-Deep   | <b>0.866</b> | <b>0.871</b> | <b>0.861</b> | <b>0.731</b> |
| <i>E. coli</i>         | DNA4mC-Deep | 0.514        | 0.648        | 0.379        | 0.057        |
|                        | i4mC-Deep   | <b>0.926</b> | <b>0.93</b>  | <b>0.922</b> | <b>0.854</b> |
| <i>G. subterraneus</i> | DNA4mC-Deep | 0.524        | 0.679        | 0.370        | 0.060        |
|                        | i4mC-Deep   | <b>0.915</b> | <b>0.904</b> | <b>0.928</b> | <b>0.833</b> |
| <i>G. pinkeringii</i>  | DNA4mC-Deep | 0.449        | 0.370        | 0.527        | -0.121       |
|                        | i4mC-Deep   | <b>0.926</b> | <b>0.915</b> | <b>0.938</b> | <b>0.855</b> |
